# Supplementary material for: Parallel fast and slow recurrent cortical processing mediates target and distractor selection in visual search
Source: PubMed Central journal article supplement (PMC7677324; doi:10.1038/s42003-020-01423-0), 2020-11-19
Supplement: 42003_2020_1423_MOESM3_ESM.pdf [file 42003_2020_1423_MOESM3_ESM.pdf]

## **Description of Additional Supplementary Files**

File Name: Supplementary Movie 1

Description: Movie illustrating the propagation of source activity in visual cortex as well as the corresponding change of the ERMF distribution underlying the Nt component.

File Name: Supplementary Movie 2

Description: Movie illustrating the propagation of source activity in visual cortex as well as the corresponding change of the ERMF distribution underlying the Pd component.

File Name: Supplementary Movie 3

Description: Movie illustrating the propagation of source activity in visual cortex as well as the corresponding change of the ERMF distribution underlying the N1pc component.

File Name: Supplementary Data 1

Description: Supplementary data for Figures 2, 3, 4, and 5.
